# Supplementary material
Source: PubMed Central journal article supplement (PMC7881746)
Supplement: supp_8.4.E852_CMAJOpen-2020-0012-1-at.pdf [file supp_8.4.E852_CMAJOpen-2020-0012-1-at.pdf]

Appendix 1 (as supplied by the authors)

Example of Transcript Analysis

| <b>Meta-Theme</b> | <b>Participant Quotes</b>                                                                                                                                                                                                                                                                                                                                                                                                                                                                                                                                                                                                                                                                                                                                                                                                                                                                                                                                                                                                                                                                                                                                                                                                                                                                                                                                                                                                                                                                                                                           | <b>Key words</b>                                                            | <b>Concept (sub-theme)</b>                                |
|-------------------|-----------------------------------------------------------------------------------------------------------------------------------------------------------------------------------------------------------------------------------------------------------------------------------------------------------------------------------------------------------------------------------------------------------------------------------------------------------------------------------------------------------------------------------------------------------------------------------------------------------------------------------------------------------------------------------------------------------------------------------------------------------------------------------------------------------------------------------------------------------------------------------------------------------------------------------------------------------------------------------------------------------------------------------------------------------------------------------------------------------------------------------------------------------------------------------------------------------------------------------------------------------------------------------------------------------------------------------------------------------------------------------------------------------------------------------------------------------------------------------------------------------------------------------------------------|-----------------------------------------------------------------------------|-----------------------------------------------------------|
| <b>Trust</b>      | <p>And, I did what I had to do because I didn't know what else there was to do. I figured the doctors, they're the experts they know what's best for me. And, I believed in them I trusted them. And I had a discussion with my mom and she asked me if I was going to do the treatment they had planned out. I said, "Yes." And, I felt it from her that she didn't agree with it she didn't want me to do the chemo. And like me, thinking, 'Mom these are professionals they know what they're doing. I'm just going to do what they want, what they think is best for me.' -patient #9</p>                                                                                                                                                                                                                                                                                                                                                                                                                                                                                                                                                                                                                                                                                                                                                                                                                                                                                                                                                      | <p>And, I believed in them I trusted them.</p>                              | <p>Physician expertise with treatment recommendations</p> |
| <b>World View</b> | <p>And I think that's all we can do and share whatever we can. It's always nice to be able to sit like this and share with people because I think it's an important thing. Sometimes you need to get the load off and it's – sometimes it gets to be a little much load. -patient #2</p> <p>– I feel like I was able to assure him that I believed I was going to be okay. Because somewhere I did believe I was going to be okay because I thought of people like [name] that were survivors – patient #5</p> <p>And I just remember being in such despair and just feeling hopeless. And then I just thought I had to – I just got strong about something and I just thought, '[name], there's survivors. There's survivors.' And that's when it hit me, this is not a death sentence. People have survived it. Then I got hope and then I just took off from there and, spoke to people – patient #4</p> <p>Right from the start I told them (children) what was going on because I just felt like I needed them to know, and I just – they're really very, very supportive and my husband is really supportive in all of it too. –patient # 2</p> <p>He got a lot of my anger and how I was screaming at that time. But I don't think he took it personally, he was very supportive. Like I said he always turned it into humor, which sometimes I'd [laughs] get even more mad but - ."My kids are supportive they're behind me 100% and they didn't want me to do the chemo either. So, that was good. We agreed on all that. -patient #9</p> | <p>Increasing morale</p> <p>Support system helps improve cancer journey</p> | <p>Importance of knowing Indigenous survivors</p>         |

|  |                                                                                                                                                                                                                                                                                                                                                                                                                                                                                                                                                                                                                                          |  |  |
|--|------------------------------------------------------------------------------------------------------------------------------------------------------------------------------------------------------------------------------------------------------------------------------------------------------------------------------------------------------------------------------------------------------------------------------------------------------------------------------------------------------------------------------------------------------------------------------------------------------------------------------------------|--|--|
|  | <p>And, through this journey I've had – I've got five children. So I've got lots of grandchildren and, now I'm on to the great grandchildren, and they're all so supportive and they've always, always been there beside me, beside their mother. Beside everybody that's been sick in my family, we're all always there.-<br/>Family Member # 2</p>                                                                                                                                                                                                                                                                                     |  |  |
|  | <p>so I'm going through the journey, and you were talking today about family ...And she was upbeat and we were chatting and, she was the strength. I could feel her strength, and that's what really helped me support. I really felt that the support of friendship is also very huge. The support of family is huge and I had that support from my children, to this day I do. But also the support of friends, So that was important so, I think that piece is really important is the support of friends. Because sometimes you don't have the family, or you're perceived as the strongest one in that family. –<br/>patient #5</p> |  |  |
